# Supplementary material for: 18F-Labeled GRPR Agonists and Antagonists: A Comparative Study in Prostate Cancer Imaging
Source: PubMed Central journal article supplement — Theranostics. 2011 Mar 7;1:220–9. doi: 10.7150/thno/v01p0220 (PMC3086613; doi:10.7150/thno/v01p0220), 2011-03-07
Supplement: thnov01p0220s1.pdf [file thnov01p0220s1.pdf]

Supplementary Information for

## **$^{18}\text{F}$ -Labeled GRPR Agonists and Antagonists: A Comparative Study in Prostate Cancer Imaging**

**Min Yang<sup>1,2\*</sup>, Haokao Gao<sup>2,3\*</sup>, Yaru Zhou<sup>4</sup>, Ying Ma<sup>2</sup>, Qimeng Quan<sup>2</sup>, Lixin Lang<sup>2</sup>, Kai Chen<sup>2</sup>, Gang Niu<sup>2</sup>, Yongjun Yan<sup>2</sup>, Xiaoyuan Chen<sup>2</sup>**

1. Key Laboratory of Nuclear Medicine, Ministry of Health, Jiangsu Key Laboratory of Molecular Nuclear Medicine, Jiangsu Institute of Nuclear Medicine, Wuxi, Jiangsu, 214063, China
2. Laboratory of Molecular Imaging and Nanomedicine (LOMIN), National Institute of Biomedical Imaging and Bioengineering (NIBIB), National Institutes of Health (NIH), Bethesda, MD 20892, USA
3. Department of Cardiology, Xijing Hospital, the Fourth Military Medical University, Xi'an, 710032, China
4. Department of Endocrinology, The Third Affiliated Hospital of Hebei Medical University, Shijiazhuang, 050051, China

\* These authors contributed equally in this work.

 Corresponding author: Email: [shawn.chen@nih.gov](mailto:shawn.chen@nih.gov) (X.C.); [yyan26@wisc.edu](mailto:yyan26@wisc.edu) (Y. Y)

**LC-MS of BBN analogs**  
FP-ATBBN

1: TOF MS ES+  
3.12e3

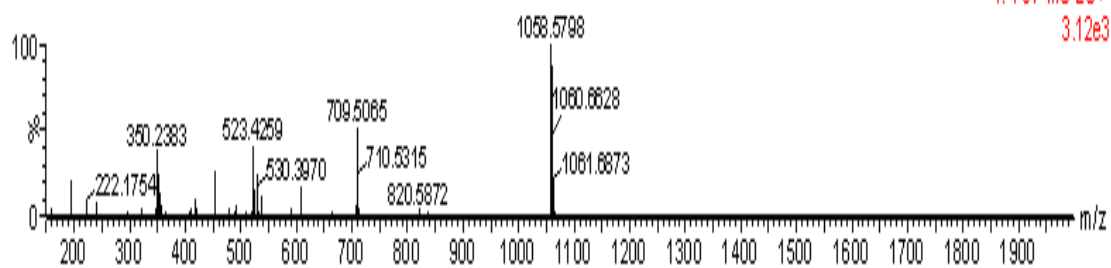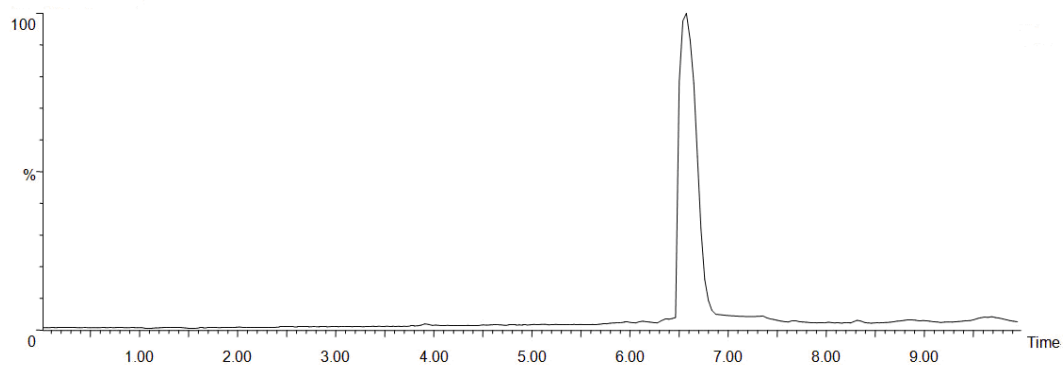

FP-MATBBN

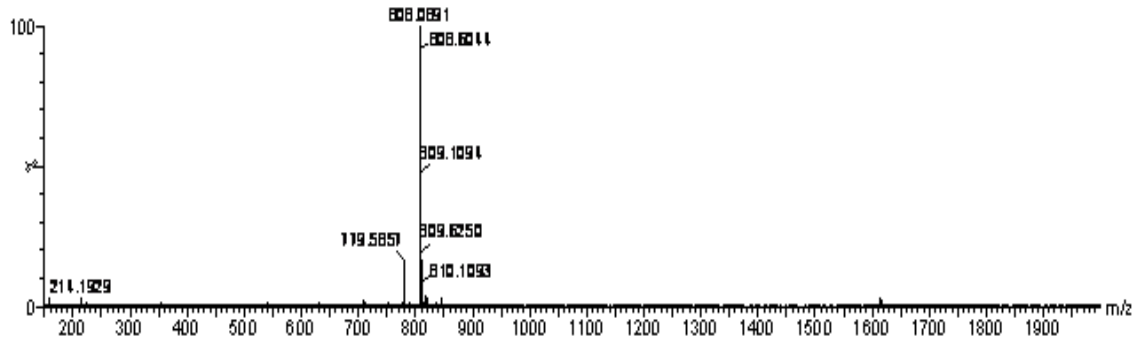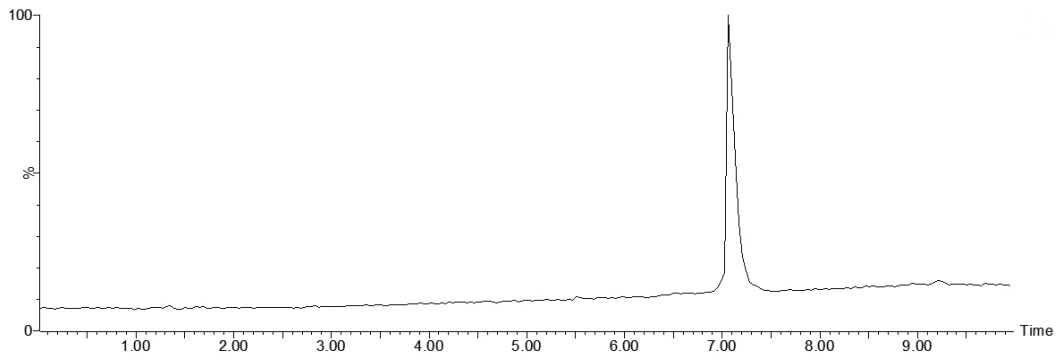

# FP-MAGBBN

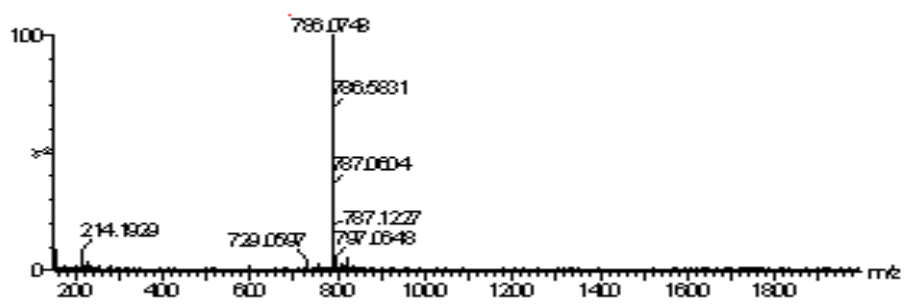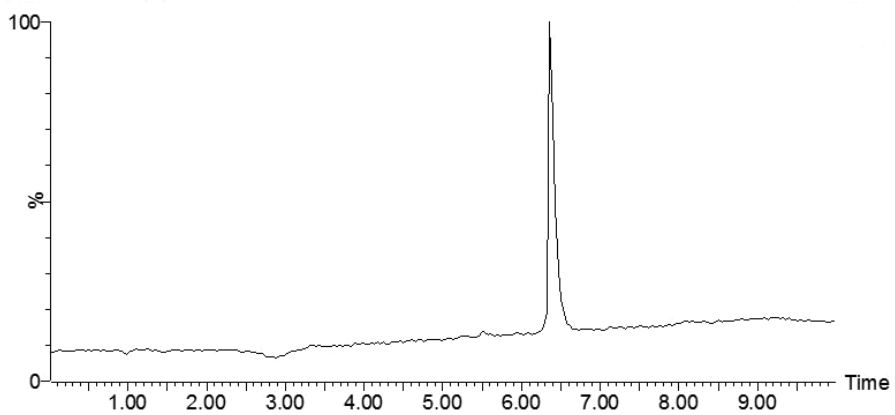

## HPLC of FP conjugated BBN analogs

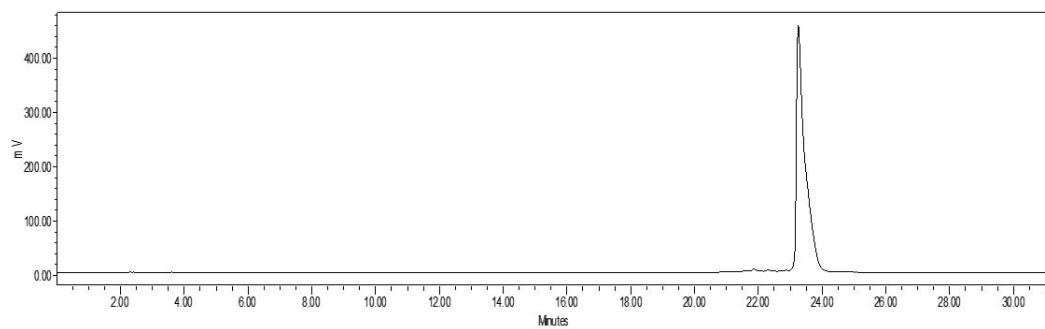

## <sup>18</sup>F-FP-ATBBN

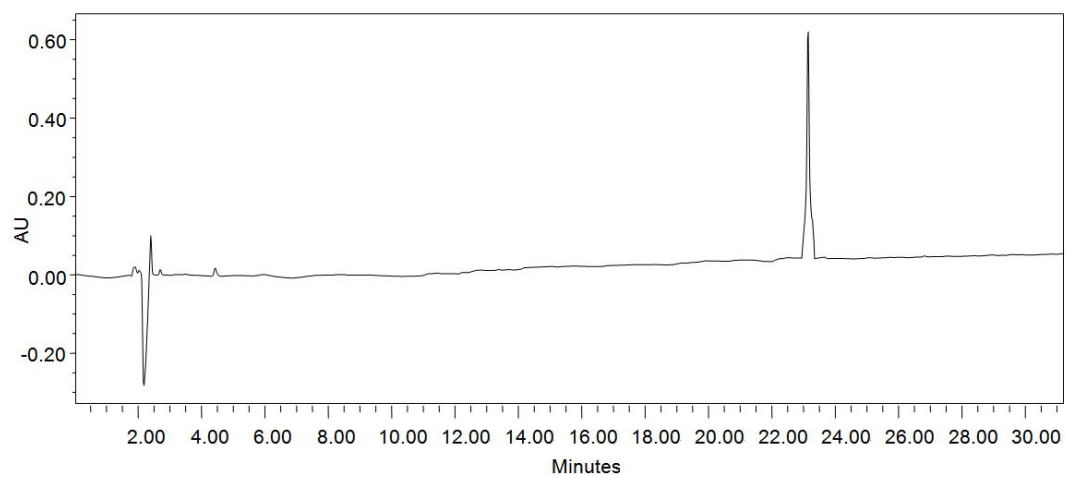

## FP-ATBBN

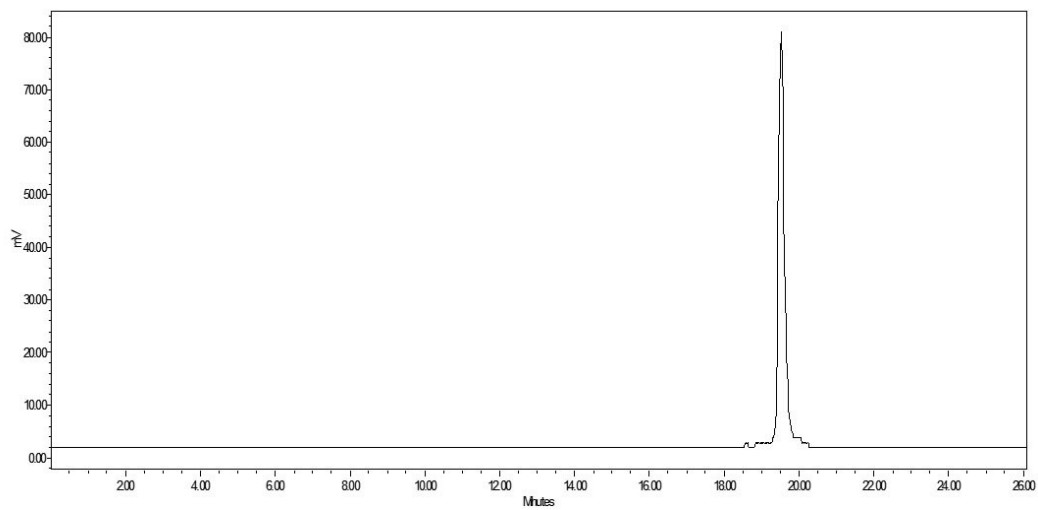

18F-FP-MATBBN

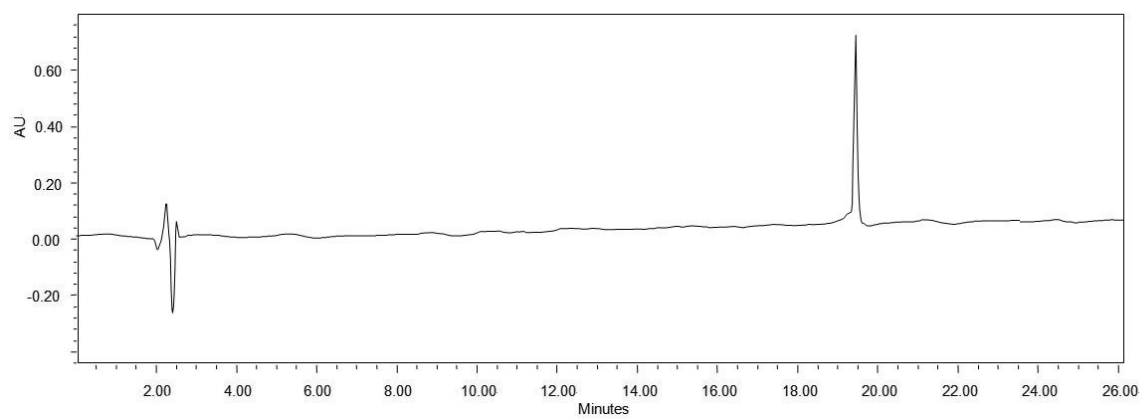

FP-MATBBN

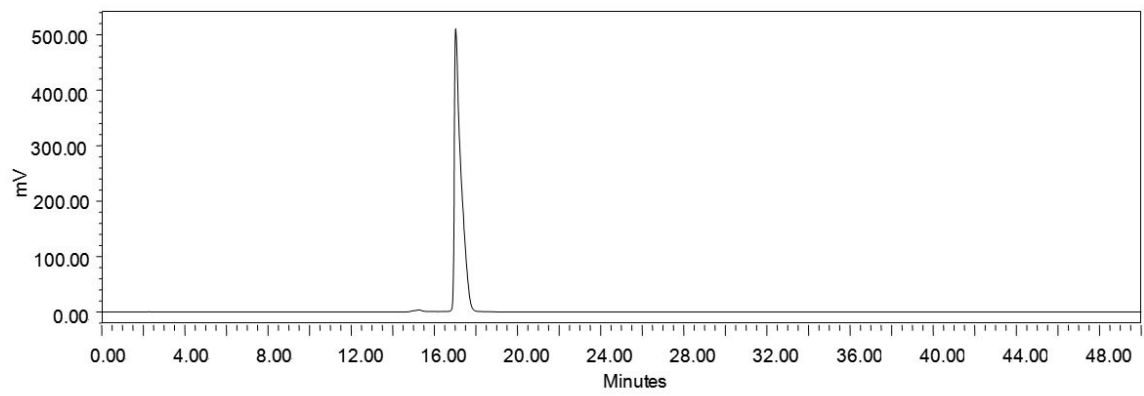

18F-FP-MAGBBN

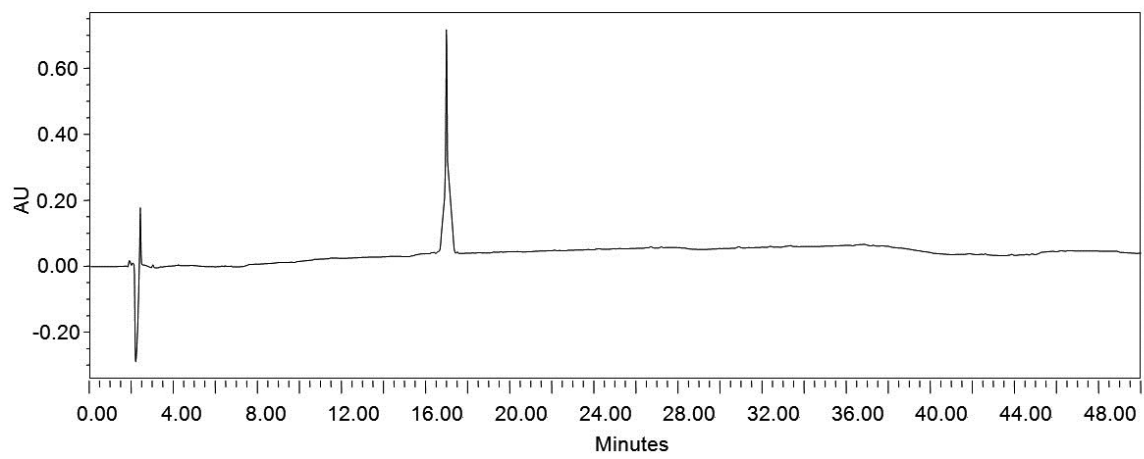

FP-MAGBBN

### **Method to determine Specific activity**

1) HPLC analysis of cold standards (4 different concentrations per standard) to draw standard curves

Y, peak area of cold standard; X: amount of cold Standard (nmol)

FP-ATBBN

$$y = 2E+06x - 85587$$

$$R^2 = 0.9992$$

FP-MATBBN

$$y = 2E+06x - 83495$$

$$R^2 = 0.9976$$

FP-MAGBBN

$$y = 2E+06x - 134308$$

$$R^2 = 0.9941$$

2) Inject 100ul of pure  $^{18}\text{F}$  radiotracer, record time and radioactivity injected

3) Measure UV area of  $^{18}\text{F}$  radiotracer, calculate the amount of  $^{18}\text{F}$  radiotracer injected according to the standard curve

4) Calculate the specific activity:

Specific activity = activity/amount of radiotracer (TBq/mmol, time decay corrected to the end of synthesis time)



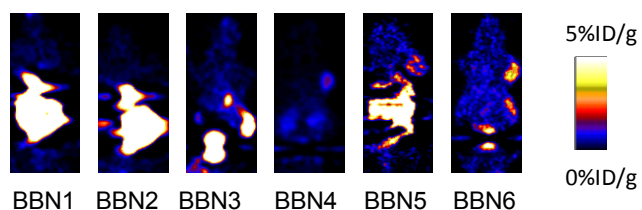

•Decay-corrected whole-body coronal microPET images of athymic male nude mice bearing PC-3 tumor at 1h after injection of 3.7 MBq (100  $\mu$ Ci) of different  $^{18}$ F labeled BBN analogs.

| Tracer | Structure                                     | Comment                                     |
|--------|-----------------------------------------------|---------------------------------------------|
| BBN1   | $^{18}$ F-FP-FQWAVGHL-NHEt                    | antagonist                                  |
| BBN2   | $^{18}$ F-FP-PEG4-FQWAVGHL-NHEt               | PEG4 modified antagonist                    |
| BBN3   | $^{18}$ F-FP-GGGRE-FQWAVGHL-NHEt              | Arg-Glu modified antagonist without spacer  |
| BBN4   | $^{18}$ F-FP- GGGRDN-FQWAVGHLM-NHEt           | Arg-Asp modified antagonist with Asn spacer |
| BBN5   | $^{18}$ F-FP-Aca-QWAVGHLM-NH <sub>2</sub>     | Agonist                                     |
| BBN6   | $^{18}$ F-FP- GGGRDN-QWAVGHLM-NH <sub>2</sub> | Arg-Asp modified agonist with Asn spacer    |
